# Supplementary material for: Postischemic Anhedonia Associated with Neurodegenerative Changes in the Hippocampal Dentate Gyrus of Rats
Source: Neural Plast. 2016 Mar 16;2016:5054275. doi: 10.1155/2016/5054275 (PMC4812484; doi:10.1155/2016/5054275)
Supplement: Supplementary file 1 — The supplemental figures show Bax and Bcl-2α immunoreactivities in the contralateral GCL and SGZ. See Section 3.5 for details. [file 5054275.f1.zip]

Archive with 2 entries (2 files):
- New folder/Sup-Figure-1R.ps
- New folder/Sup-Figure-2R.ps
